# Supplementary material
Source: PubMed Central journal article supplement (PMC4946995)
Supplement: NIHMS788558-supplement-3.pdf [file NIHMS788558-supplement-3.pdf]

**A**

CPY\*-TM

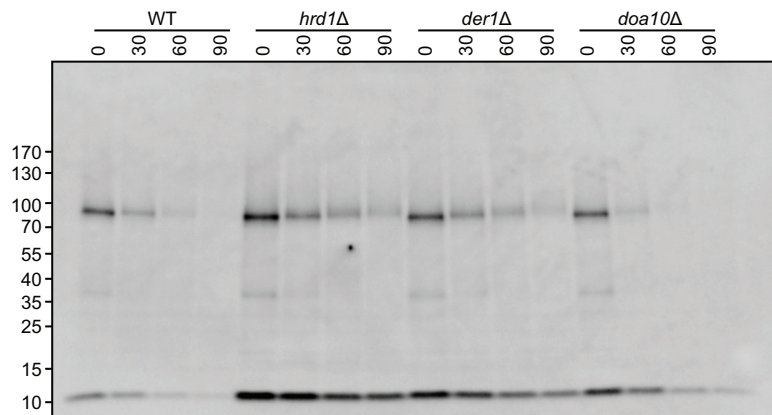**B**

CPY\*-TM2

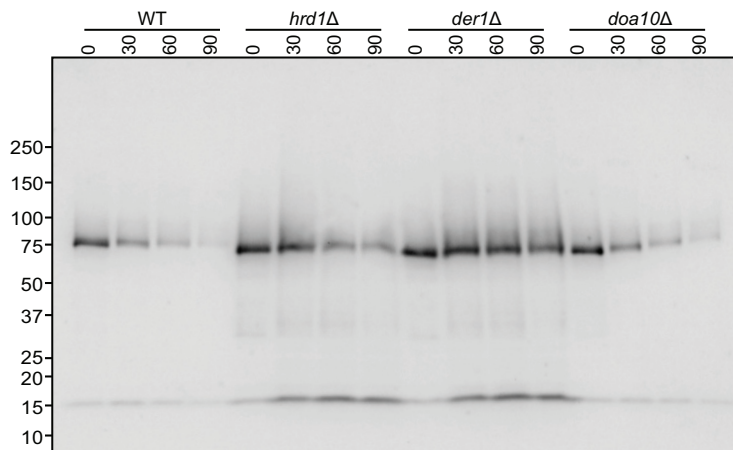**C**

CPY\*-TM WIHGGFSLLEDENATDTCSFCQISTTNDYLANVNSFYSERWRN**YGIFICYIAFN**YIAGVFFY**WLA**RVPRRNGRLSRR  
 CPY\*-TM2 WIHGGFSLLEGG**LLFFWIP**PLTLVLL**LCFTLSNL**RVPRR Pdr5 TM  
 ← CPY\* Spt23 TM
