# Supplementary material
Source: PubMed Central journal article supplement (PMC4946995)

**A**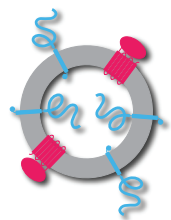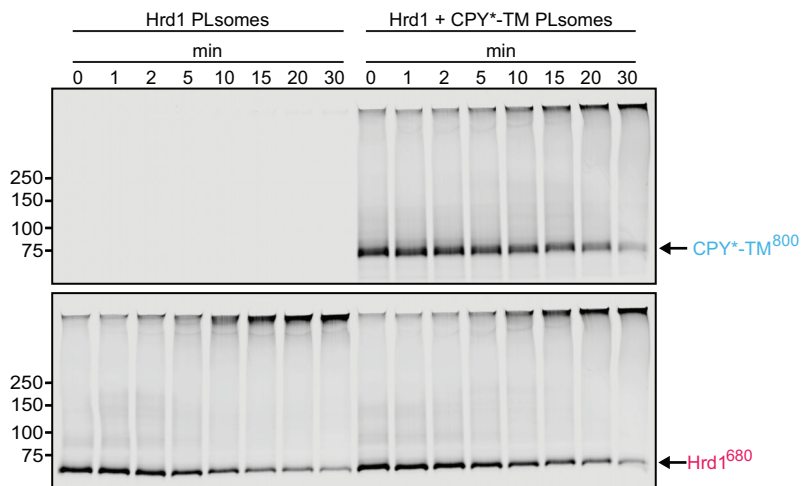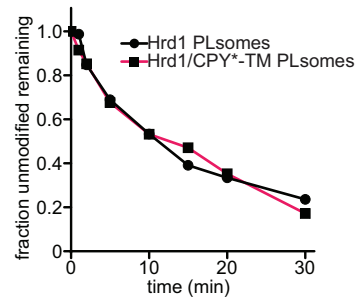**B**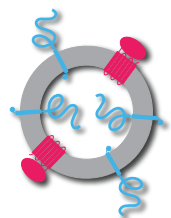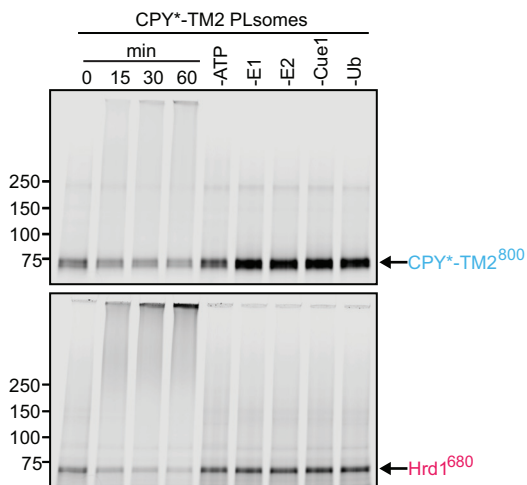**C**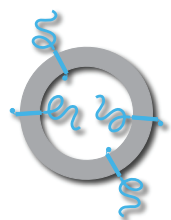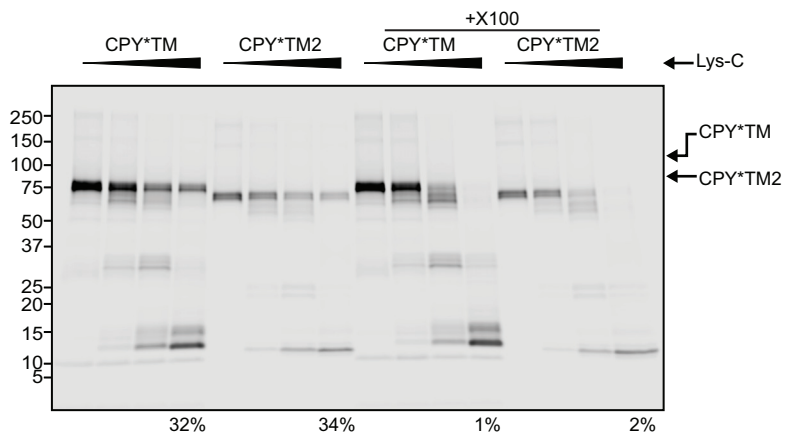

Supplement: NIHMS788558-supplement-4.pdf [file NIHMS788558-supplement-4.pdf]

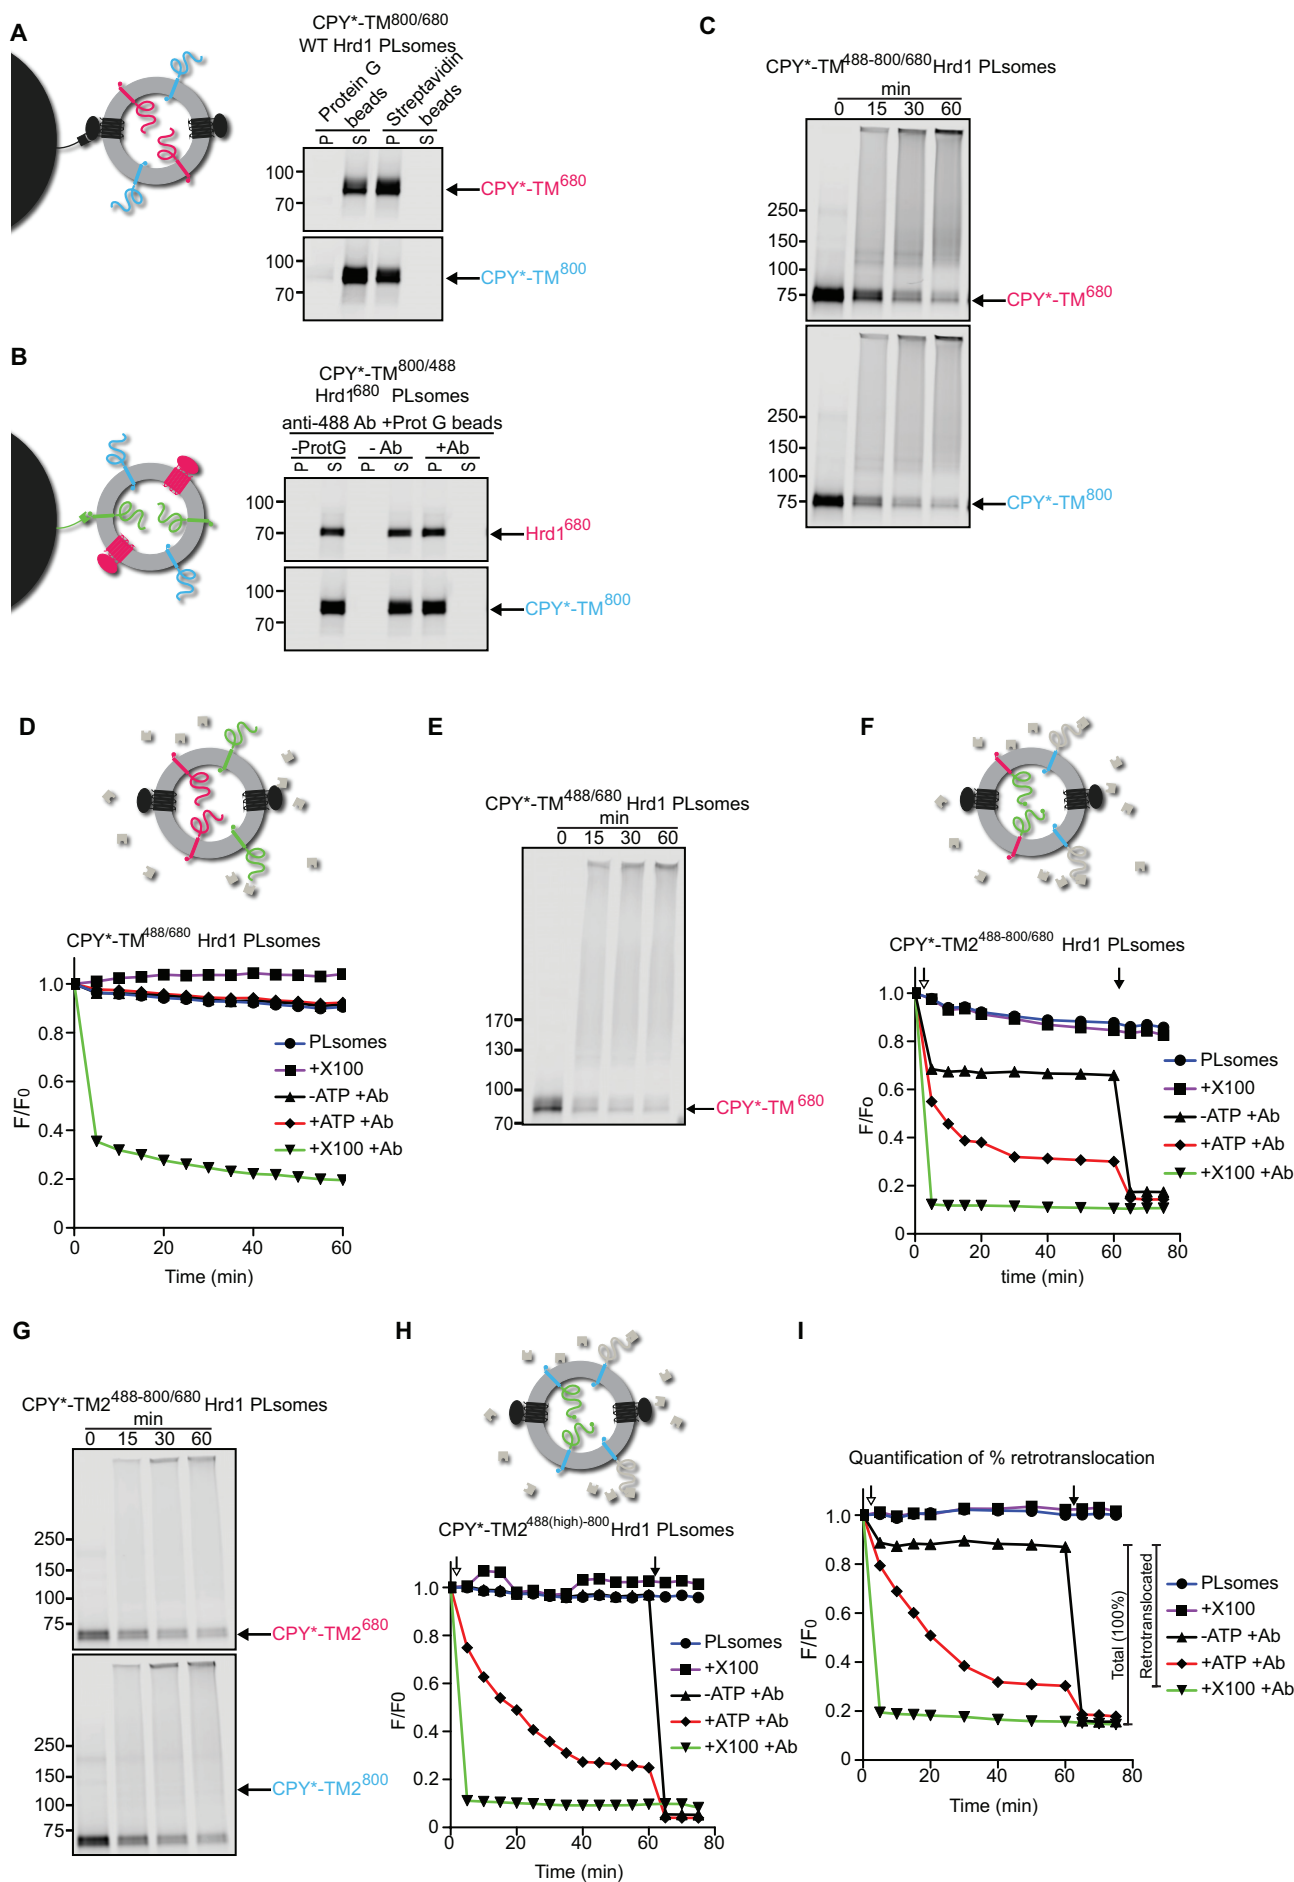

Supplement: NIHMS788558-supplement-5.pdf [file NIHMS788558-supplement-5.pdf]

**A**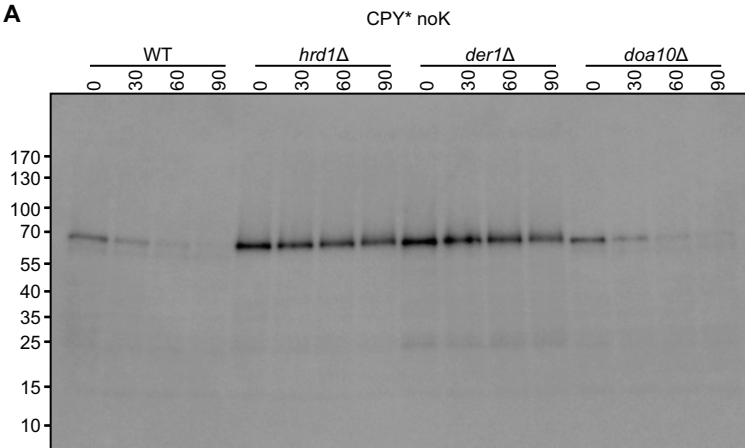**B**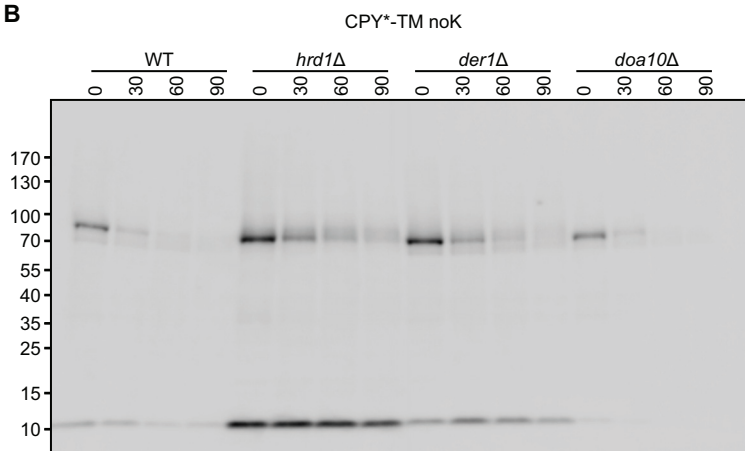**C**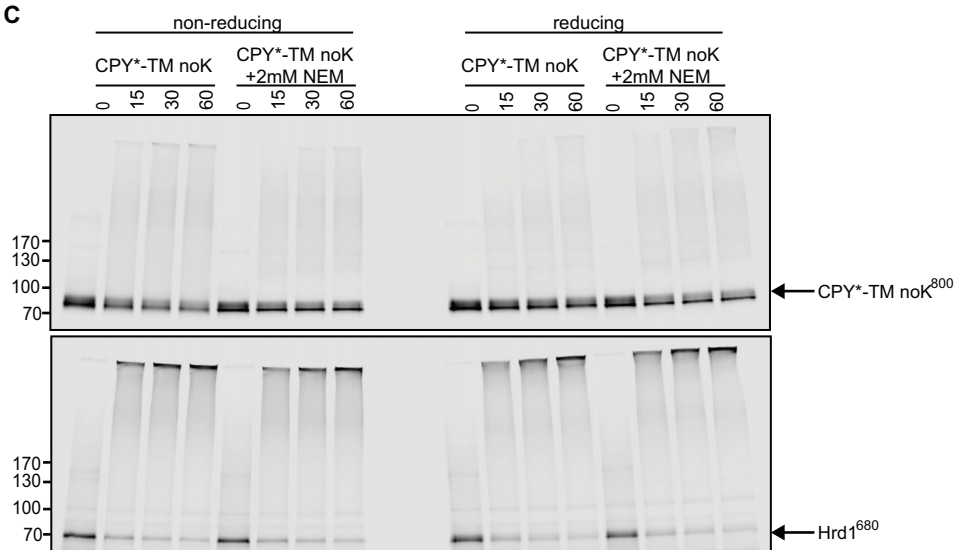

Supplement: NIHMS788558-supplement-6.pdf [file NIHMS788558-supplement-6.pdf]

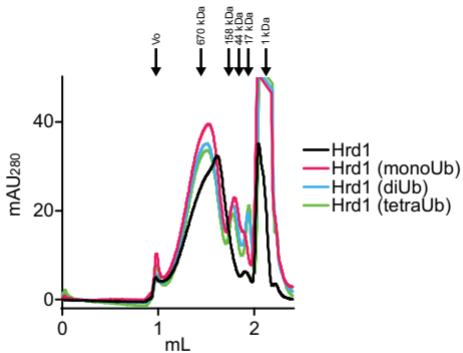

Supplement: NIHMS788558-supplement-7.pdf [file NIHMS788558-supplement-7.pdf]

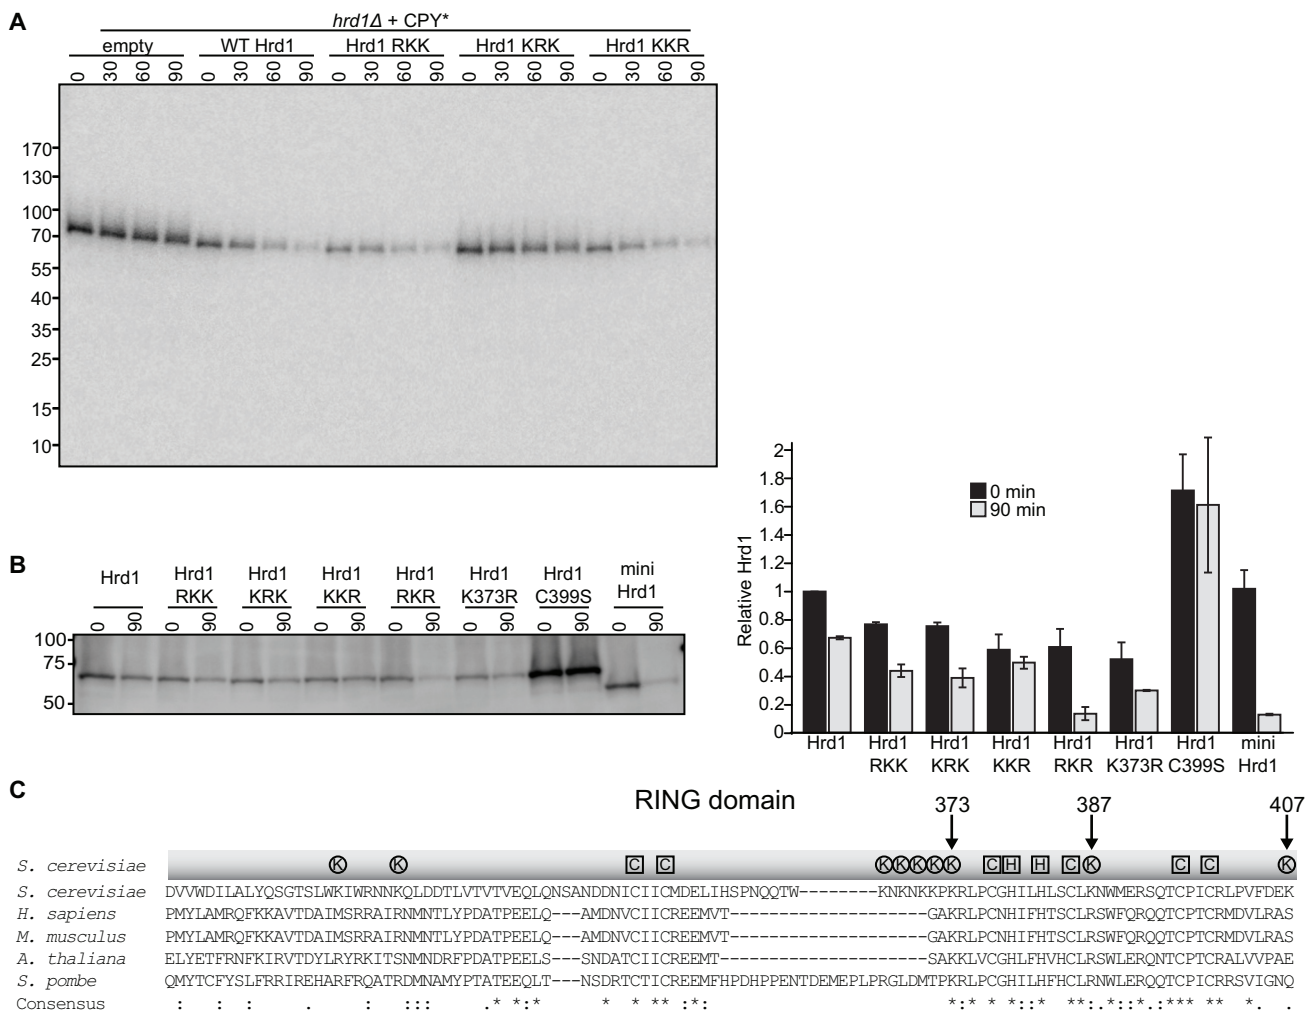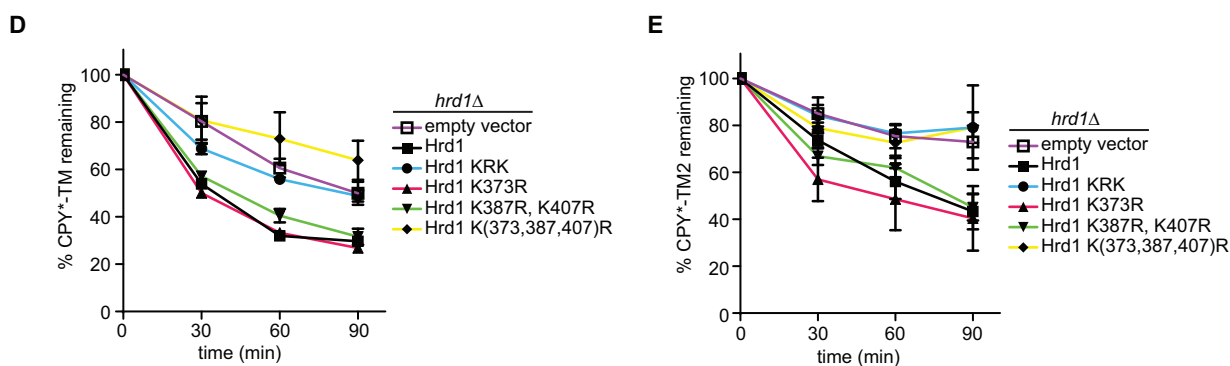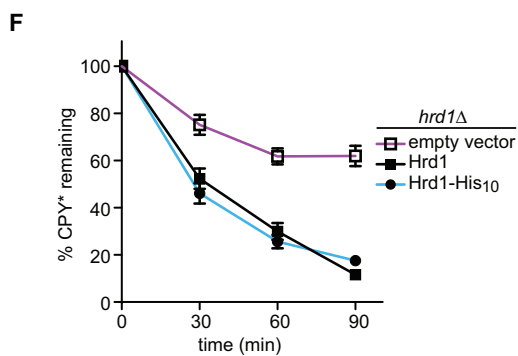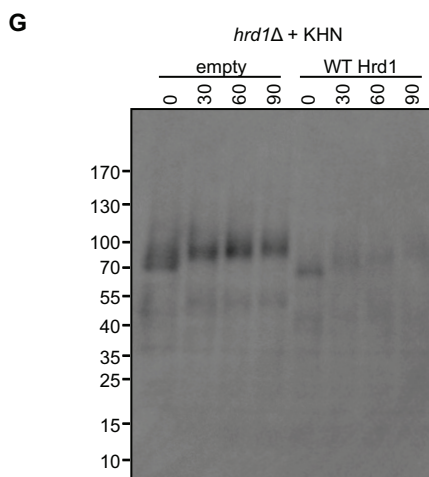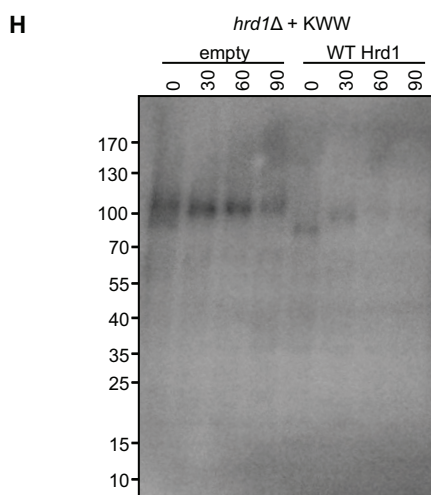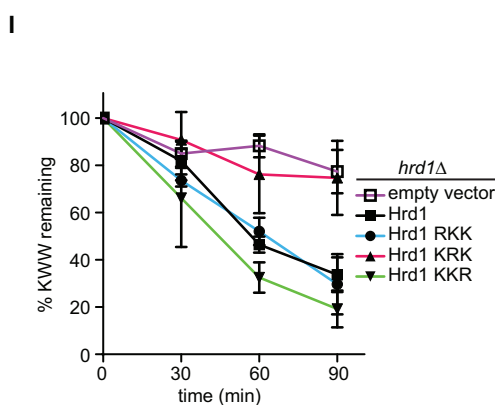

Supplement: NIHMS788558-supplement-8.pdf [file NIHMS788558-supplement-8.pdf]
